# Supplementary material for: Inpatient Capacity at Children’s Hospitals during Pandemic (H1N1) 2009 Outbreak, United States
Source: PubMed Central journal article supplement (PMC3320222; doi:10.3201/eid1709.101950), 2011-09
Supplement: 10-1950-Techapp_2p.pdf [file 10-1950-Techapp_2p.pdf]

# Inpatient Capacity at Children’s Hospitals during Pandemic (H1N1) 2009 Outbreak, United States

## Technical Appendix

At baseline (all of 2008), during the 2008-09 seasonal influenza period, and during pandemic (H1N1) 2009, non-ICU and ICU occupancy levels were high. Occupancy in non-ICU beds was higher during the pandemic period compared with the 2008-09 seasonal influenza epidemic for 2 of 34 hospitals for which comparison data were available (Technical Appendix Figure 1).

Occupancy in ICU beds was higher during the pandemic period than during the 2008-09 seasonal influenza pandemic period for 4 of 34 hospitals (Technical Appendix Figure 2). Across the 34 hospitals, the median ratio of 2009 pandemic period occupancy to 2008-9 seasonal influenza occupancy was 0.92 (0.86–0.96) for non-ICU beds and 0.90 (0.78–0.99) for ICU beds.

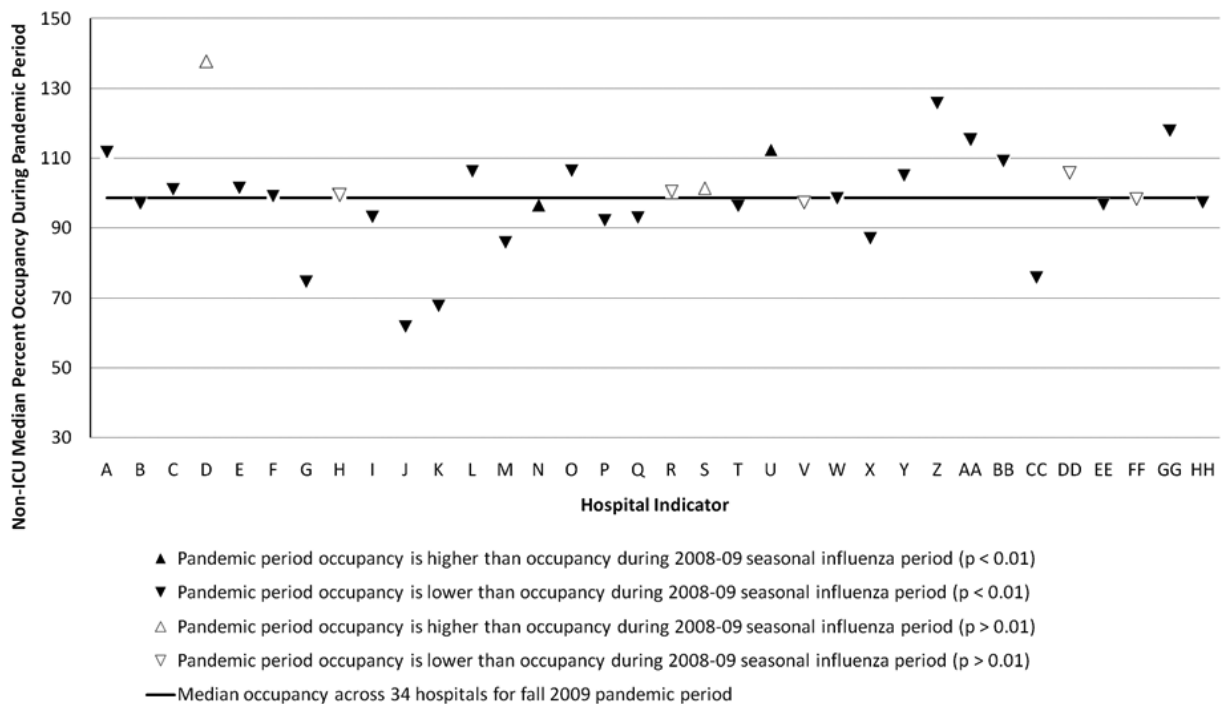

Technical Appendix Figure 1.

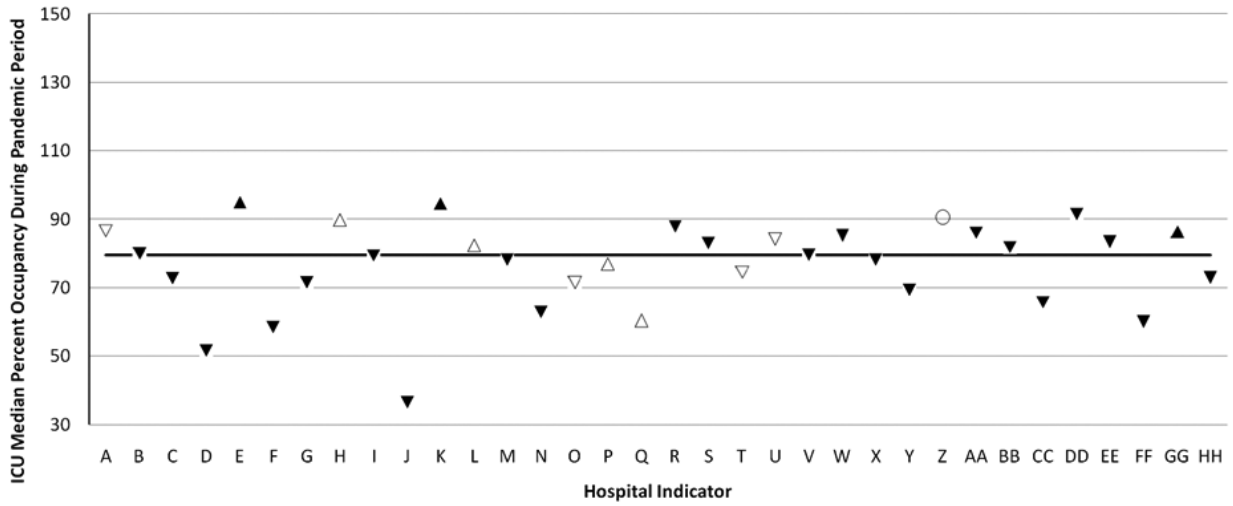

- ▲ Pandemic period occupancy is higher than occupancy during 2008-09 seasonal influenza period ( $p < 0.01$ )
- ▼ Pandemic period occupancy is lower than occupancy during 2008-09 seasonal influenza period ( $p < 0.01$ )
- △ Pandemic period occupancy is higher than occupancy during 2008-09 seasonal influenza period ( $p > 0.01$ )
- ▽ Pandemic period occupancy is lower than occupancy during 2008-09 seasonal influenza period ( $p > 0.01$ )
- Pandemic period occupancy is equal to occupancy during 2008-09 seasonal influenza period ( $p > 0.01$ )
- Median occupancy across 34 hospitals for fall 2009 pandemic period

Technical Appendix Figure 2.
